# Supplementary material for: Hypercoagulability State Combined with Post-Treatment Hypofibrinolysis in Invasive Breast Cancer: A Seven-Year Follow-Up Evaluating Disease-Free and Overall Survival
Source: MDPI journal article supplement (doi:10.3390/life13051106), 2023-04-28
Supplement: s1 [file s1]

**Table S1.** The hemostatic profile analysis of pre/post treatment TFPI activity, TFPI antigen and TF antigen in respect to clinicopathological features.

| Variables of interest         | Pre-treatment<br>TFPI activity<br>[U/mL]<br><i>p</i> -value | Post-treatment<br>TFPI activity<br>[U/mL]<br><i>p</i> -value | <i>p</i> -value* | Pre-treatment<br>TFPI antigen<br>[ng/mL]<br><i>p</i> -value | Post-treatment<br>TFPI antigen<br>[ng/mL]<br><i>p</i> -value | <i>p</i> -value** | Pre-treatment<br>TF antigen<br>[ng/mL]<br><i>p</i> -value | Post-treatment<br>TF antigen<br>[ng/mL]<br><i>p</i> -value | <i>p</i> -value*** |
|-------------------------------|-------------------------------------------------------------|--------------------------------------------------------------|------------------|-------------------------------------------------------------|--------------------------------------------------------------|-------------------|-----------------------------------------------------------|------------------------------------------------------------|--------------------|
| Age                           | 1.32                                                        | 1.72                                                         |                  | 40.68                                                       | 42.93                                                        |                   | 581.87                                                    | 837.69                                                     |                    |
| < 56 years                    | 1.10/1.50                                                   | 1.30/1.96                                                    | <b>0.0077</b>    | 33.40/46.44                                                 | 33.71/52.76                                                  | 0.2116            | 400.86/752.35                                             | 689.43/999.12                                              | <b>0.0001</b>      |
| ≥ 56 years                    | 1.30                                                        | 1.70                                                         |                  | 48.24                                                       | 42.77                                                        |                   | 500.39                                                    | 789.00                                                     |                    |
|                               | 1.16/1.48                                                   | 1.12/2.20                                                    | <b>0.0155</b>    | 41.00/60.32                                                 | 38.54/52.48                                                  | 0.3575            | 402.49/596.73                                             | 642.06/973.34                                              | <b>&lt;0.0001</b>  |
|                               | <i>p</i> =0.7324                                            | <i>p</i> =0.8877                                             |                  | <i>p</i> = <b>0.0052</b>                                    | <i>p</i> =0.5132                                             |                   | <i>p</i> =0.2039                                          | <i>p</i> =0.8063                                           |                    |
| Menopausal status             | 1.39                                                        | 1.75                                                         |                  | 42.36                                                       | 44.30                                                        |                   | 579.64                                                    | 827.41                                                     |                    |
| pre-menopause                 | 1.28/1.56                                                   | 1.56/2.08                                                    | <b>0.0258</b>    | 31.96/46.44                                                 | 33.71/46.53                                                  | 0.1240            | 431.59/752.35                                             | 594.88/1002.42                                             | <b>0.0076</b>      |
| post-menopause                | 1.28                                                        | 1.64                                                         |                  | 45.86                                                       | 42.65                                                        |                   | 521.26                                                    | 815.96                                                     |                    |
|                               | 1.14/1.46                                                   | 1.10/2.10                                                    | <b>0.0045</b>    | 39.48/60.16                                                 | 38.13/53.46                                                  | 0.5299            | 400.94/686.50                                             | 660.92/973.34                                              | <b>&lt;0.0001</b>  |
|                               | <i>p</i> =0.2901                                            | <i>p</i> =0.4899                                             |                  | <i>p</i> =0.0934                                            | <i>p</i> =0.6061                                             |                   | <i>p</i> =0.3869                                          | <i>p</i> =0.8544                                           |                    |
| Body mass index               | 1.31                                                        | 1.70                                                         |                  | 40.86                                                       | 42.22                                                        |                   | 551.95                                                    | 805.96                                                     |                    |
| BMI ≤ 24.99 kg/m <sup>2</sup> | 1.20/1.50                                                   | 0.90/1.96                                                    | 0.0641           | 35.04/48.24                                                 | 33.01/47.86                                                  | 0.6435            | 402.49/718.7                                              | 671.43/973.34                                              | <b>&lt;0.0001</b>  |
| BMI ≥ 25 kg/m <sup>2</sup>    | 1.31                                                        | 1.72                                                         |                  | 48.02                                                       | 44.30                                                        |                   | 552.70                                                    | 842.45                                                     |                    |
|                               | 1.1/1.48                                                    | 1.42/2.20                                                    | <b>0.0026</b>    | 40.68/61.88                                                 | 39.16/52.76                                                  | 0.4653            | 400.94/726.12                                             | 642.06/1002.68                                             | <b>&lt;0.0001</b>  |
|                               | <i>p</i> =0.5393                                            | <i>p</i> =0.5058                                             |                  | <i>p</i> = <b>0.0467</b>                                    | <i>p</i> =0.1958                                             |                   | <i>p</i> =0.9528                                          | <i>p</i> =0.7338                                           |                    |
| Parity status                 | 1.24                                                        | 1.30                                                         |                  | 40.98                                                       | 37.93                                                        |                   | 597.19                                                    | 785.1                                                      |                    |
| 0                             | 1.16/1.4                                                    | 0.90/2.20                                                    | 0.7532           | 31.96/50.4                                                  | 33.71/42.16                                                  | 0.7532            | 521.76/724.55                                             | 671.43/890.45                                              | 0.0747             |
| 1-2                           | 1.30                                                        | 1.74                                                         |                  | 44.04                                                       | 42.93                                                        |                   | 565.46                                                    | 837.69                                                     |                    |
| 3 and more                    | 1.14/1.46                                                   | 1.40/2.08                                                    | <b>0.0004</b>    | 37.64/55.76                                                 | 38.39/52.76                                                  | 0.8105            | 402.49/726.12                                             | 660.85/973.34                                              | <b>&lt;0.0001</b>  |
|                               | 1.42                                                        | 1.70                                                         |                  | 47.68                                                       | 44.84                                                        |                   | 500.39                                                    | 774.18                                                     |                    |
|                               | 1.16/1.58                                                   | 1.10/1.96                                                    | 0.2489           | 40.68/61.88                                                 | 35.44/52.48                                                  | 0.2489            | 392.64/554.97                                             | 660.92/1022.32                                             | <b>0.0030</b>      |
|                               | <i>p</i> =0.5062                                            | <i>p</i> =0.8238                                             |                  | <i>p</i> =0.3091                                            | <i>p</i> =0.5423                                             |                   | <i>p</i> =0.4857                                          | <i>p</i> =0.9686                                           |                    |
| Smoking status                | 1.42                                                        | 1.82                                                         |                  | 44.04                                                       | 46.51                                                        |                   | 596.73                                                    | 874.53                                                     |                    |
| Smokers                       | 1.2/1.58                                                    | 1.48/2.38                                                    | <b>0.0168</b>    | 38.00/55.76                                                 | 42.53/52.76                                                  | 0.5228            | 400.86/774.32                                             | 660.92/985.32                                              | <b>0.0006</b>      |
| Non-smokers                   | 1.28                                                        | 1.68                                                         |                  | 44.48                                                       | 41.91                                                        |                   | 539.93                                                    | 800.00                                                     |                    |
|                               | 1.12/1.46                                                   | 1.10/2.00                                                    | <b>0.0078</b>    | 37.64/58.80                                                 | 33.71/52.48                                                  | 0.4688            | 431.59/649.85                                             | 660.85/999.12                                              | <b>&lt;0.0001</b>  |
|                               | <i>p</i> =0.1864                                            | <i>p</i> =0.2752                                             |                  | <i>p</i> =0.8311                                            | <i>p</i> =0.1116                                             |                   | <i>p</i> =0.4755                                          | <i>p</i> =0.5170                                           |                    |
| Tumour localization           | 1.38                                                        | 1.92                                                         |                  | 46.44                                                       | 43.23                                                        |                   | 554.97                                                    | 756.30                                                     |                    |
| Left breast                   | 1.26/1.58                                                   | 1.4/2.38                                                     | <b>0.0066</b>    | 40.12/60.32                                                 | 38.54/52.76                                                  | 0.5178            | 400.94/686.50                                             | 615.39/999.12                                              | <b>0.0001</b>      |
| Right breast                  | 1.20                                                        | 1.56                                                         |                  | 43.00                                                       | 42.16                                                        |                   | 550.43                                                    | 866.51                                                     |                    |
|                               | 1.12/1.40                                                   | 1.12/1.08                                                    | <b>0.0190</b>    | 35.04/50.80                                                 | 33.76/51.59                                                  | 0.7213            | 402.49/726.12                                             | 689.43/985.32                                              | <b>&lt;0.0001</b>  |
|                               | <i>p</i> = <b>0.0411</b>                                    | <i>p</i> =0.1711                                             |                  | <i>p</i> =0.1135                                            | <i>p</i> =0.4075                                             |                   | <i>p</i> =0.7843                                          | <i>p</i> =0.2059                                           |                    |

|                       |                  |                        |               |                  |                  |        |                  |                  |                   |
|-----------------------|------------------|------------------------|---------------|------------------|------------------|--------|------------------|------------------|-------------------|
|                       | 1.30             | 1.74                   |               | 44.04            | 43.23            |        | 550.43           | 822.71           |                   |
| Histological type     | 1.12/1.48        | 1.12/2.20              | <b>0.0003</b> | 38.00/58.80      | 37.87/56.46      | 0.9701 | 392.64/654.26    | 660.92/985.32    | <b>&lt;0.0001</b> |
| IDC                   | 1.26/1.60        | 1.68                   |               | 44.48            | 42.53            |        | 686.50           | 884.08           |                   |
| ILC                   | <i>p</i> =0.1991 | 1.18/1.76              | 0.5940        | 35.60/50.40      | 35.44/45.66      | 0.4413 | 520.76/728.94    | 642.06/1002.68   | 0.0506            |
|                       |                  | <i>p</i> =0.3461       |               | <i>p</i> =0.7561 | <i>p</i> =0.4315 |        | <i>p</i> =0.2636 | <i>p</i> =0.7719 |                   |
|                       | 1.32             | 1.60                   |               | 44.48            | 42.61            |        | 554.97           | 831.91           |                   |
| Histological grade    | 1.16/1.56        | 1.10/2.00              | <b>0.0194</b> | 37.12/55.76      | 33.76/52.48      | 0.7190 | 402.49/726.12    | 660.85/1002.42   | <b>&lt;0.0001</b> |
| G1 + G2               | 1.28             | 1.96                   |               | 43.44            | 46.50            |        | 474.14           | 800.00           |                   |
| G3                    | 0.84/1.42        | 1.76/2.52              | <b>0.0046</b> | 40.28/58.80      | 39.16/52.76      | 0.7007 | 386.02/592.28    | 712.42/847.20    | 0.0107            |
|                       | <i>p</i> =0.1811 | <b><i>p</i>=0.0342</b> |               | <i>p</i> =0.8929 | <i>p</i> =0.4091 |        | <i>p</i> =0.4897 | <i>p</i> =0.6154 |                   |
|                       | 1.34             | 1.72                   |               | 44.48            | 42.28            |        | 539.93           | 774.18           |                   |
| cT category (7th ed.) | 1.12/1.60        | 1.02/2.20              | <b>0.0171</b> | 38.00/50.80      | 36.06/56.46      | 0.8741 | 402.49/724.55    | 615.39/1002.68   | <b>&lt;0.0001</b> |
| T1                    | 1.30             | 1.70                   |               | 44.16            | 43.76            |        | 562.47           | 837.69           |                   |
| T2                    | 1.16/1.42        | 1.18/1.96              | <b>0.0032</b> | 37.64/60.36      | 38.54/49.00      | 0.8552 | 400.94/654.26    | 738.68/900.71    | <b>0.0001</b>     |
|                       | <i>p</i> =0.4889 | <i>p</i> =0.8255       |               | <i>p</i> =0.7611 | <i>p</i> =0.9273 |        | <i>p</i> =0.9818 | <i>p</i> =0.7727 |                   |
|                       | 1.34             | 1.58                   |               | 43.74            | 42.92            |        | 505.96           | 805.96           |                   |
| cN category (7th ed.) | 1.16/1.56        | 0.90/1.96              | <b>0.0482</b> | 39.08/60.16      | 37.87/51.59      | 0.6392 | 392.64/686.50    | 655.33/985.32    | <b>&lt;0.0001</b> |
| N0                    | 1.21             | 1.81                   |               | 45.80            | 42.85            |        | 594.51           | 865.64           |                   |
| N1                    | 1.12/1.46        | 1.56/2.52              | <b>0.0007</b> | 32.24/55.00      | 36.06/58.16      | 0.6475 | 500.39/728.94    | 691.40/1121.33   | <b>0.0012</b>     |
|                       | <i>p</i> =0.2796 | <b><i>p</i>=0.0405</b> |               | <i>p</i> =0.7839 | <i>p</i> =0.9550 |        | <i>p</i> =0.1050 | <i>p</i> =0.3881 |                   |
|                       | 1.39             | 1.48                   |               | 42.68            | 42.39            |        | 459.23           | 743.30           |                   |
| cStage (7th ed.)      | 1.05/1.61        | 0.70/2.15              | 0.3037        | 38.54/50.02      | 36.66/54.47      | 0.9544 | 386.02/721.63    | 603.96/1002.55   | <b>0.0004</b>     |
| IA                    | 1.29             | 1.76                   |               | 45.56            | 43.08            |        | 564.71           | 834.90           |                   |
| IIA+IIB               | 1.15/1.44        | 1.47/2.07              | <b>0.0001</b> | 36.84/60.26      | 37.23/52.18      | 0.8137 | 435.58/690.19    | 690.42/925.19    | <b>&lt;0.0001</b> |
|                       | <i>p</i> =0.3340 | <i>p</i> =0.1047       |               | <i>p</i> =0.5312 | <i>p</i> =0.9459 |        | <i>p</i> =0.2515 | <i>p</i> =0.6782 |                   |
|                       | 1.29             | 1.64                   |               | 44.58            | 42.65            |        | 556.45           | 815.96           |                   |
| Molecular subtype     | 1.14/1.58        | 1.30/2.00              | <b>0.0225</b> | 38.00/50.80      | 35.44/48.85      | 0.5214 | 402.49/728.94    | 642.06/985.32    | <b>&lt;0.0001</b> |
| Luminal A             | 1.34             | 1.87                   |               | 42.90            | 44.80            |        | 538.37           | 827.41           |                   |
| Non-luminal A         | 1.14/1.42        | 1.10/1.38              | <b>0.0046</b> | 37.64/61.88      | 38.93/56.46      | 0.7702 | 392.64/654.26    | 691.40/999.12    | <b>0.0001</b>     |
|                       | <i>p</i> =0.7540 | <i>p</i> =0.2761       |               | <i>p</i> =0.6871 | <i>p</i> =0.3435 |        | <i>p</i> =0.6926 | <i>p</i> =0.9940 |                   |
|                       | 1.28             | 1.50                   |               | 44.68            | 42.16            |        | 550.43           | 831.91           |                   |
| Proliferation marker  | 1.16/1.5         | 0.76/1.96              | 0.1587        | 38.00/55.00      | 33.71/47.86      | 0.2953 | 400.94/726.12    | 660.85/1002.68   | <b>&lt;0.0001</b> |
| expression            | 1.36             | 1.94                   |               | 42.36            | 46.99            |        | 554.97           | 822.71           |                   |
| Ki67 < 20%            | 1.10/1.48        | 1.68/2.52              | <b>0.0003</b> | 37.64/61.88      | 41.41/56.46      | 0.3392 | 439.56/581.87    | 691.40/890.45    | <b>0.0005</b>     |
| Ki67 ≥ 20%            | <i>p</i> =0.9938 | <b><i>p</i>=0.0042</b> |               | <i>p</i> =0.9198 | <i>p</i> =0.0546 |        | <i>p</i> =0.7982 | <i>p</i> =0.6756 |                   |

TFPI: Tissue factor pathway inhibitor; TF: Tissue factor; IDC: Invasive ductal carcinoma; ILC: Invasive lobular carcinoma; G1: low grade; G2: intermediate grade; G3: high grade; T1: tumor diameter ≤ 2 cm; T2: tumor diameter > 2 cm to ≤ 5 cm; N0: lack of lymph node metastases; N1: spread to axillary lymph nodes; ER: oestrogen receptor; PR: progesterone receptor; HER2: human epidermal growth factor receptor 2; Ki67: proliferation marker; BCS: breast-conserving surgery; MRM: modified radical mastectomy. Data are expressed as median (Me) and the inter-quartile range (IQR) [lower quartile (Q1)/upper quartile (Q3)]; *p*-value\* for differences between pre-treatment and post-treatment TFPI activity; *p*-value\*\* for differences between pre-treatment and post-treatment TFPI antigen; *p*-value\*\*\* for differences between pre-treatment and post-treatment TF antigen; significant differences are denoted by bold *p*-values.

**Table S2.** The hemostatic profile analysis of pre/post treatment TF activity, t-PA antigen and PAI-1 antigen in respect to clinicopathological features.

| Variables of interest         | Pre-treatment TF activity [U/mL]<br><i>p</i> -value | Post-treatment TF activity [U/mL]<br><i>p</i> -value | <i>p</i> -value* | Pre-treatment t-PA antigen [ng/mL]<br><i>p</i> -value | Post-treatment t-PA antigen [ng/mL]<br><i>p</i> -value | <i>p</i> -value** | Pre-treatment PAI-1 antigen [ng/mL]<br><i>p</i> -value | Post-treatment PAI-1 antigen [ng/mL]<br><i>p</i> -value | <i>p</i> -value*** |
|-------------------------------|-----------------------------------------------------|------------------------------------------------------|------------------|-------------------------------------------------------|--------------------------------------------------------|-------------------|--------------------------------------------------------|---------------------------------------------------------|--------------------|
| Age                           | 13.88                                               | 18.64                                                | <b>0.1128</b>    | 5.30                                                  | 3.13                                                   | <b>0.0003</b>     | 38.56                                                  | 77.05                                                   | <b>0.0004</b>      |
| < 56 years                    | 11.62/29.88                                         | 11.20/38.53                                          |                  | 4.23/6.87                                             | 1.79/4.21                                              |                   | 27.73/49.60                                            | 44.20/84.33                                             |                    |
| ≥ 56 years                    | 11.86                                               | 27.69                                                |                  | 6.16                                                  | 3.01                                                   |                   | 37.19                                                  | 79.20                                                   |                    |
|                               | 10.42/25.88                                         | 12.76/34.09                                          |                  | 4.30/7.16                                             | 2.05/5.91                                              |                   | 30.30/44.46                                            | 49.87/85.97                                             |                    |
|                               | <i>p</i> =0.1935                                    | <i>p</i> =0.7437                                     |                  | <i>p</i> =0.5037                                      | <i>p</i> =0.3806                                       |                   | <i>p</i> =0.5424                                       | <i>p</i> =0.3231                                        |                    |
| Menopausal status             | 13.46                                               | 16.78                                                | 0.0962           | 5.20                                                  | 2.55                                                   | <b>0.0186</b>     | 36.83                                                  | 81.20                                                   | <b>0.0015</b>      |
| pre-menopause                 | 10.61/23.59                                         | 11.22/32.97                                          |                  | 4.23/7.72                                             | 2.02/4.21                                              |                   | 26.42/49.60                                            | 47.33/85.08                                             |                    |
| post-menopause                | 12.605                                              | 27.84                                                |                  | 5.84                                                  | 3.21                                                   |                   | 38.23                                                  | 77.48                                                   |                    |
|                               | 11.17/29.59                                         | 12.76/37.68                                          |                  | 4.28/7.12                                             | 1.98/4.96                                              |                   | 30.30/44.97                                            | 49.1/85.97                                              |                    |
|                               | <i>p</i> =0.7864                                    | <i>p</i> =0.4736                                     |                  | <i>p</i> =0.9234                                      | <i>p</i> =0.4682                                       |                   | <i>p</i> =0.8339                                       | <i>p</i> =0.7731                                        |                    |
| Body mass index               | 13.65                                               | 26.15                                                | <b>0.0041</b>    | 5.26                                                  | 2.85                                                   | <b>0.0014</b>     | 37.03                                                  | 55.30                                                   | <b>0.0024</b>      |
| BMI ≤ 24.99 kg/m <sup>2</sup> | 11.62/29.59                                         | 12.12/37.68                                          |                  | 4.14/6.7                                              | 2.18/4.96                                              |                   | 27.73/45.48                                            | 45.96/79.31                                             |                    |
| BMI ≥ 25 kg/m <sup>2</sup>    | 12.085                                              | 27.41                                                |                  | 6.10                                                  | 3.21                                                   |                   | 38.54                                                  | 82.05                                                   |                    |
|                               | 10.03/23.31                                         | 11.18/34.09                                          |                  | 4.34/7.25                                             | 1.87/4.94                                              |                   | 30.3/45.3                                              | 73.27/87.71                                             |                    |
|                               | <i>p</i> =0.1714                                    | <i>p</i> =0.5542                                     |                  | <i>p</i> =0.2804                                      | <i>p</i> =0.8418                                       |                   | <i>p</i> =0.9176                                       | <i>p</i> =0.0021                                        |                    |
| Parity status                 | 17.705                                              | 28.16                                                | 0.1159           | 6.065                                                 | 3.4                                                    | 0.1730            | 33.48                                                  | 54.03                                                   | <b>0.0277</b>      |
| 0                             | 12.31/39.16                                         | 13.17/43.56                                          |                  | 3.86/8.82                                             | 2.18/6.42                                              |                   | 22.66/40.00                                            | 45.96/78.15                                             |                    |
| 1-2                           | 12.75                                               | 17.91                                                |                  | 5.3                                                   | 2.69                                                   |                   | 38.52                                                  | 79.31                                                   |                    |
| 3 and more                    | 10.61/24.17                                         | 11.22/33.11                                          |                  | 4.30/6.86                                             | 1.98/4.21                                              |                   | 30.27/47.43                                            | 49.1/84.65                                              |                    |
|                               | 12.46                                               | 27.99                                                | 0.0028           | 6.13                                                  | 4.21                                                   | 0.3109            | 37.9                                                   | 78.46                                                   | <b>0.0015</b>      |
|                               | 11.47/33.47                                         | 20.3/38.1                                            |                  | 4.2/7.16                                              | 2.05/6.99                                              |                   | 33.7/45.3                                              | 49.48/87.58                                             |                    |
|                               | <i>p</i> =0.4813                                    | <i>p</i> =0.4918                                     |                  | <i>p</i> =0.9310                                      | <i>p</i> =0.4127                                       |                   | <i>p</i> =0.5833                                       | <i>p</i> =0.4811                                        |                    |
| Smoking status                | 11.77                                               | 27.13                                                | <b>0.0395</b>    | 6.66                                                  | 3.28                                                   | <b>0.0217</b>     | 35.50                                                  | 79.20                                                   | <b>0.0049</b>      |
| Smokers                       | 9.81/23.59                                          | 16.10/34.09                                          |                  | 4.30/7.16                                             | 2.68/4.21                                              |                   | 33.70/42.73                                            | 49.10/87.58                                             |                    |
| Non-smokers                   | 13.60                                               | 27.13                                                |                  | 5.48                                                  | 2.67                                                   |                   | 38.52                                                  | 78.15                                                   |                    |
|                               | 11.17/29.59                                         | 11.18/37.68                                          |                  | 4.23/7.12                                             | 1.78/5.02                                              |                   | 28.10/47.43                                            | 47.70/84.65                                             |                    |
|                               | <i>p</i> =0.4704                                    | <i>p</i> =0.4908                                     |                  | <i>p</i> =0.3091                                      | <i>p</i> =0.1893                                       |                   | <i>p</i> =0.7182                                       | <i>p</i> =0.7803                                        |                    |
| Tumour localization           | 11.77                                               | 27.99                                                | <b>0.0011</b>    | 5.96                                                  | 3.13                                                   | <b>0.0007</b>     | 42.73                                                  | 79.44                                                   | <b>0.0001</b>      |
| Left breast                   | 10.03/29.59                                         | 12.12/38.53                                          |                  | 4.28/7.16                                             | 2.02/4.96                                              |                   | 33.96/49.82                                            | 49.1/85.08                                              |                    |
| Right breast                  | 13.70                                               | 18.64                                                |                  | 5.30                                                  | 2.69                                                   |                   | 35.12                                                  | 73.27                                                   |                    |
|                               | 12.31/25.88                                         | 11.20/33.45                                          |                  | 4.14/7.12                                             | 1.98/4.55                                              |                   | 24.18/40.44                                            | 47.33/85.29                                             |                    |

|                                 |                        |                  |               |                  |                        |                   |                        |                  |                   |
|---------------------------------|------------------------|------------------|---------------|------------------|------------------------|-------------------|------------------------|------------------|-------------------|
|                                 | <i>p</i> =0.2485       | <i>p</i> =0.4201 |               | <i>p</i> =0.9410 | <i>p</i> =0.8244       |                   | <b><i>p</i>=0.0210</b> | <i>p</i> =0.4074 |                   |
| Histological type               | 13.16                  | 27.13            | <b>0.0011</b> | 5.87             | 3.34                   | <b>0.0001</b>     | 39.39                  | 79.31            | <b>&lt;0.0001</b> |
| IDC                             | 10.61/29.59            | 12.06/38.53      |               | 4.30/7.16        | 2.02/5.09              |                   | 32.37/47.36            | 49.87/86.65      |                   |
| ILC                             | 12.31                  | 27.13            | 0.1097        | 4.83             | 2.31                   | <b>0.0077</b>     | 28.10                  | 47.70            | <b>0.0077</b>     |
|                                 | 11.80/21.31            | 11.22/32.97      |               | 3.86/6.16        | 1.78/2.57              |                   | 22.66/32.37            | 45.96/79.20      |                   |
|                                 | <i>p</i> =0.8684       | <i>p</i> =0.5551 |               | <i>p</i> =0.2380 | <b><i>p</i>=0.0193</b> |                   | <b><i>p</i>=0.0199</b> | <i>p</i> =0.0857 |                   |
| Histological grade              | 12.46                  | 25.17            | <b>0.0011</b> | 5.69             | 3.14                   | <b>0.0001</b>     | 37.19                  | 77.90            | <b>&lt;0.0001</b> |
| G1 + G2                         | 10.61/26.92            | 12.06/37.68      |               | 4.207.12         | 2.18/5.09              |                   | 27.73/44.97            | 46.21/85.97      |                   |
| G3                              | 14.18                  | 27.69            | 0.1159        | 5.71             | 2.31                   | <b>0.0046</b>     | 40.44                  | 81.25            | <b>0.0019</b>     |
|                                 | 11.86/24.17            | 10.13/31.99      |               | 5.10/7.25        | 1.98/3.95              |                   | 30.30/49.06            | 72.58/84.33      |                   |
|                                 | <i>p</i> =0.4091       | <i>p</i> =0.7672 |               | <i>p</i> =0.8225 | <i>p</i> =0.2363       |                   | <i>p</i> =0.3237       | <i>p</i> =0.3746 |                   |
| cT category (7th ed.)           | 12.31                  | 27.13            | <b>0.0030</b> | 5.26             | 2.67                   | <b>0.0001</b>     | 38.56                  | 74.69            | <b>0.0001</b>     |
| T1                              | 11.47/24.17            | 12.76/34.09      |               | 4.23/6.34        | 1.66/4.21              |                   | 27.73/47.36            | 47.70/84.33      |                   |
| T2                              | 13.70                  | 27.13            | <b>0.0416</b> | 6.44             | 3.58                   | <b>0.0074</b>     | 37.20                  | 79.20            | <b>0.0001</b>     |
|                                 | 9.02/29.59             | 11.22/42.63      |               | 4.55/7.78        | 2.49/6.99              |                   | 32.37/44.60            | 60.72/87.12      |                   |
|                                 | <i>p</i> =0.8433       | <i>p</i> =0.8672 |               | <i>p</i> =0.1246 | <i>p</i> =0.0704       |                   | <i>p</i> =0.9939       | <i>p</i> =0.3420 |                   |
| cN category (7th ed.)           | 12.61                  | 27.84            | <b>0.0009</b> | 5.70             | 3.31                   | <b>0.0012</b>     | 37.73                  | 78.18            | <b>&lt;0.0001</b> |
| N0                              | 10.61/24.17            | 12.12/38.53      |               | 4.23/7.38        | 2.05/5.02              |                   | 28.10/47.36            | 49.48/85.29      |                   |
| N1                              | 13.52                  | 17.51            | 0.1701        | 5.68             | 2.64                   | <b>0.0003</b>     | 37.88                  | 76.68            | <b>0.0002</b>     |
|                                 | 11.77/29.88            | 11.20/32.97      |               | 4.83/6.34        | 1.98/4.21              |                   | 30.30/45.30            | 46.21/84.65      |                   |
|                                 | <i>p</i> =0.5398       | <i>p</i> =0.2870 |               | <i>p</i> =0.8909 | <i>p</i> =0.2981       |                   | <i>p</i> =0.8339       | <i>p</i> =0.8026 |                   |
| cStage (7th ed.)                | 12.06                  | 29.09            | <b>0.0018</b> | 4.92             | 2.98                   | <b>0.0119</b>     | 36.70                  | 76.30            | <b>0.0066</b>     |
| IA                              | 11.10/23.88            | 15.41/38.11      |               | 4.22/6.76        | 1.69/4.75              |                   | 27.92/47.74            | 48.59/84.71      |                   |
| IIA+IIB                         | 13.65                  | 17.51            | 0.0638        | 6.10             | 3.07                   | <b>0.0001</b>     | 38.04                  | 78.83            | <b>&lt;0.0001</b> |
|                                 | 11.12/29.74            | 11.25/33.77      |               | 4.45/7.43        | 2.18/5.47              |                   | 31.34/44.95            | 47.02/85.97      |                   |
|                                 | <i>p</i> =0.3733       | <i>p</i> =0.3897 |               | <i>p</i> =0.1918 | <i>p</i> =0.5115       |                   | <i>p</i> =0.9579       | <i>p</i> =0.7172 |                   |
| Molecular subtype               | 12.06                  | 17.87            | <b>0.0038</b> | 5.19             | 2.64                   | <b>0.0001</b>     | 34.69                  | 79.26            | <b>&lt;0.0001</b> |
| Luminal A                       | 10.03/23.31            | 11.18/34.09      |               | 4.20/7.16        | 1.98/4.55              |                   | 27.30/43.77            | 46.21/85.97      |                   |
| Non-luminal A                   | 14.59                  | 27.84            | <b>0.0490</b> | 5.97             | 3.64                   | <b>0.0153</b>     | 40.62                  | 77.60            | <b>0.0006</b>     |
|                                 | 11.86/39.16            | 15.65/41.89      |               | 4.34/6.87        | 2.05/5.09              |                   | 36.46/49.60            | 49.48/84.33      |                   |
|                                 | <b><i>p</i>=0.0119</b> | <i>p</i> =0.1943 |               | <i>p</i> =0.7940 | <i>p</i> =0.3667       |                   | <i>p</i> =0.0654       | <i>p</i> =0.9821 |                   |
| Proliferation marker expression | 12.31                  | 20.30            | <b>0.0003</b> | 5.26             | 2.67                   | <b>&lt;0.0001</b> | 35.50                  | 77.90            | <b>&lt;0.0001</b> |
| Ki67 < 20%                      | 10.39/23.31            | 11.22/34.09      |               | 4.14/7.16        | 1.87/4.55              |                   | 27.30/44.60            | 46.21/85.29      |                   |
| Ki67 ≥ 20%                      | 15.20                  | 27.99            | 0.2736        | 6.06             | 3.69                   | <b>0.0326</b>     | 40.80                  | 78.46            | <b>0.0019</b>     |
|                                 | 11.86/39.16            | 16.10/39.87      |               | 4.34/6.87        | 2.60/5.09              |                   | 36.46/49.60            | 71.24/84.33      |                   |
|                                 | <b><i>p</i>=0.0126</b> | <i>p</i> =0.5404 |               | <i>p</i> =0.5611 | <i>p</i> =0.1825       |                   | <i>p</i> =0.0882       | <i>p</i> =0.4293 |                   |

TF: Tissue factor; t-PA: Tissue plasminogen activator; PAI-1: Plasminogen activator inhibitor-1; IDC: Invasive ductal carcinoma; ILC: Invasive lobular carcinoma; G1: low grade; G2: intermediate grade; G3: high grade; T1: tumor diameter ≤ 2 cm; T2: tumor diameter > 2 cm to ≤ 5 cm; N0: lack of lymph node metastases; N1: spread to axillary lymph nodes; ER: oestrogen receptor; PR: progesterone receptor; HER2: human epidermal growth factor receptor 2; Ki67: proliferation marker; BCS: breast-conserving surgery; MRM: modified radical mastectomy. Data are expressed as median (Me) and the inter-quartile range (IQR) [lower quartile (Q1)/upper quartile (Q3)]; *p*-value\* for differences between pre-treatment and post-treatment TF activity; *p*-value\*\* for differences between pre-treatment and post-treatment t-PA antigen; *p*-value\*\*\* for differences between pre-treatment and post-treatment PAI-1 antigen; significant differences are denoted by bold *p*-values.

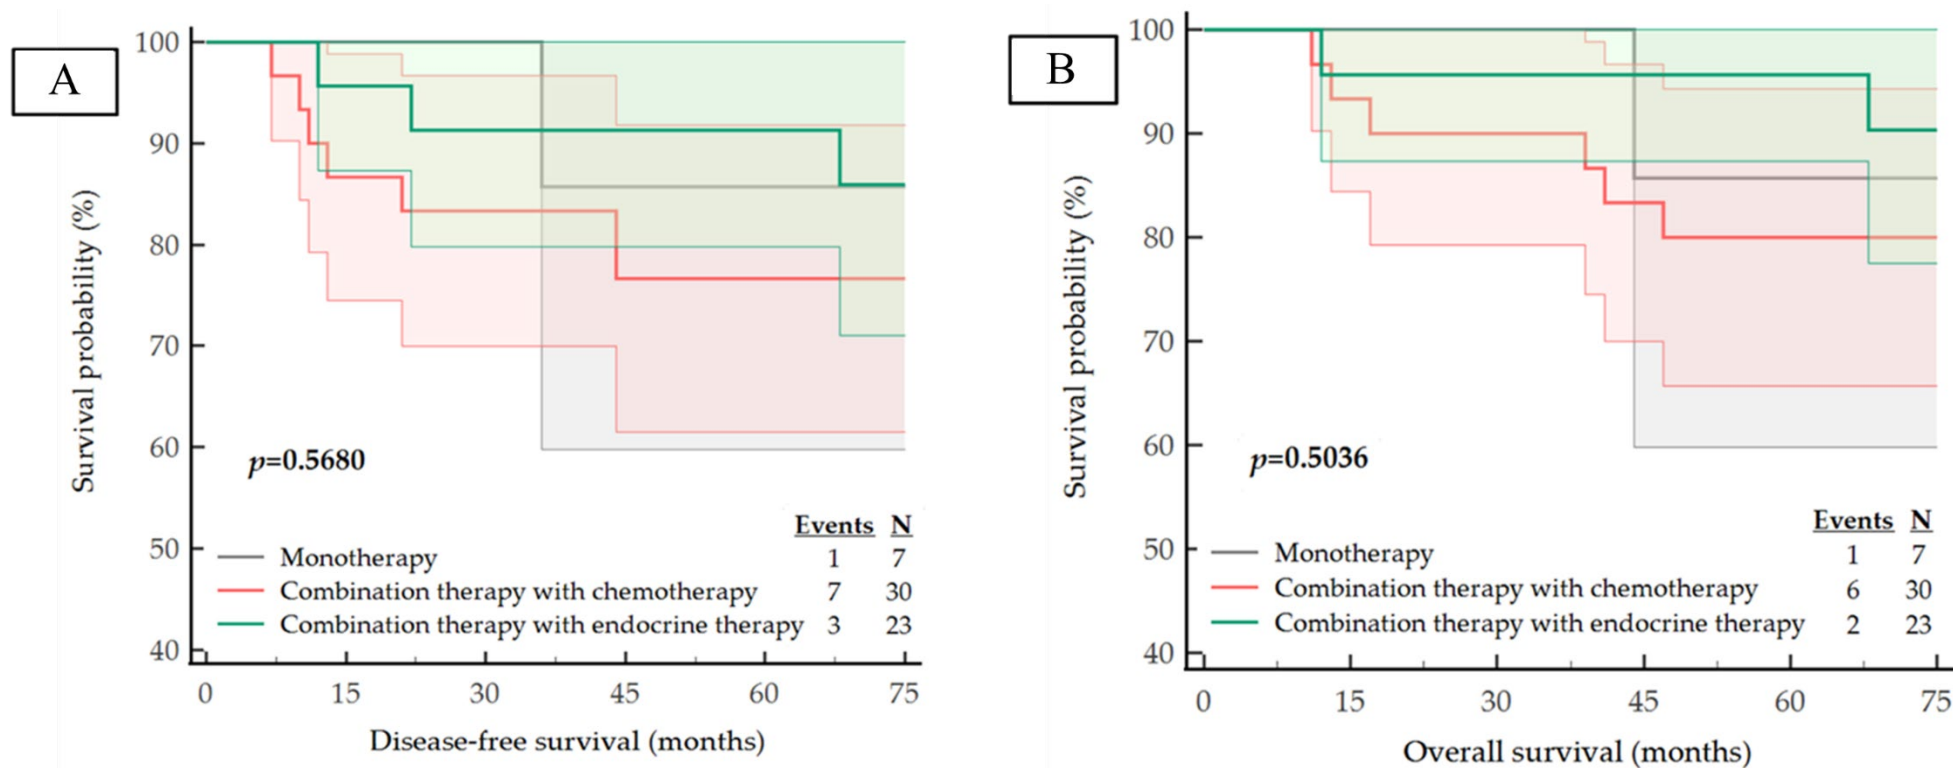

**Figure S1.** (A) Disease-free survival (DFS) and (B) overall survival (OS) analysis of the studied population regarding types of adjuvant therapy in IBrC patients.
